# Supplementary material for: A Randomized Controlled Trial on the Effects of Leucine-Supplement Combined with Nutritional Counseling on Body Composition in Mix Cancer Older Men
Source: MDPI journal article supplement (doi:10.3390/nu16020210), 2024-01-09
Supplement: s1 [file s1]

**Table S1.** Sensibility analyses between the Leucine and control groups.

| Characteristics            | Complete<br>(n= 36) | Incomplete (n= 20) | p     |
|----------------------------|---------------------|--------------------|-------|
|                            | x ± SD              | x ± SD             |       |
| BMI (kg/m <sup>2</sup> ) § | 22.96±3.29          | 22.52±2.79         | 0.933 |
|                            | n (%)               | n (%)              |       |
| Site of primary tumor **   |                     |                    |       |
| Esophagus                  | 2 (5.56)            | 2 (10)             | 0.215 |
| Stomach                    | 9 (25.00)           | 11(55)             |       |
| Colorectal                 | 22 (61.1)           | 3 (15)             |       |
| Liver                      | 1 (2.78)            | 3 (15)             |       |
| Pancreas                   | 2(5.56)             | 1(5)               |       |
| Type of chemotherapy **    |                     |                    |       |
| Adjuvant                   | 35 (97.2)           | 17(85)             | 0.125 |
| Neoadjuvant                | 1(2.8)              | 3(15)              |       |
| Cancer stage **            |                     |                    |       |
| I                          | 1(2.78)             | 0(0.0)             | 0.351 |
| II                         | 10(27.78)           | 2(10)              |       |
| III                        | 11(30.56)           | 7(35)              |       |
| IV                         | 14(38.88)           | 11(55)             |       |
| Cancer cachexia stage **   |                     |                    |       |
| No cachexia                | 7(19.44)            | 5(25)              | 0.778 |
| Pre cachexia               | 14(38.89)           | 6(30)              |       |
| Cachexia                   | 15(41.67)           | 9(45)              |       |

x: Mean; SD: Standard Deviation

§ p-value obtained using Student's t-test at a significance level of 5%.

\*\* p-value obtained using the Chi-square test or Fisher's exact test at a significance level of 5%.
